# Supplementary material for: The metabolic characteristics and environmental adaptations of the intertidal bacterium Palleronia sp. LCG004
Source: Front Microbiol. 2024 Nov 22;15:1469112. doi: 10.3389/fmicb.2024.1469112 (PMC11638410; doi:10.3389/fmicb.2024.1469112)
Supplement: Supplementary file 2 [file Table_1.xlsx]

## Sheet: Sheet1
#Table S1:The MIGS morphological information and general characteristics of Palleronia sp. LCG004.
Project	Description
General Functions
Classification	Domain Bacteria
	Phylum Pseudomonadota
	Class Alphaproteobacteria
	Order Rhodobacterales
	Family Roseobacteraceae
	Genus Palleronia
	Strain LCG004
Gram Staining	Negative
Cell shape	Spherical
Colour	Pink
Temperature	20-32℃ (optimal , 28℃)
MIGS information
Project name	Palleronia sp. LCG004 Genome sequencing
NCBI BioProject Accession	PRJNA1023697
Geographic location	Luchao Harbour, Shanghai
Latitude and longitude	121.9°E、 30.8°N
Depth	0m
Date of collection	2022–12
Relationship to oxygen	Strictly aerobic
Biological relationship	Free-living
Sequencing method	PacBio-RS
Assembly method	FALCON v. v. 3/12/2018
Coverage	300×
Completion strategy	complete
