# Supplementary material for: The metabolic characteristics and environmental adaptations of the intertidal bacterium Palleronia sp. LCG004
Source: Front Microbiol. 2024 Nov 22;15:1469112. doi: 10.3389/fmicb.2024.1469112 (PMC11638410; doi:10.3389/fmicb.2024.1469112)
Supplement: Supplementary file 3 [file Table_2.xlsx]

## Sheet: Sheet1
#Table S2: Physiological and biochemical features of strain LCG004 based on API ZYM, API 20 NE, Biolog GEN III.
API ZYM			API 20NE system			Biolog GEN III
Alkaline phosphatase	+		Reduction of nitrates to nitrites	－		Dextrin	+
Esterase(C4)	+		Indole-production (tryptophane)	－		D-Mlatose	+
Esterase lipase(C8)	+		Fermentation (glucose)	+		D-Trehalose	+
Lipase(C14)	－		Arginine dihydrolase	－		Sucrose	+
Leucine arylamidase	+		urease	－		D-Turanose	+
waline arylamidase	w		Hydrolysis (β-glucosidase) esculin	+		D-Raffinose	+
Cystine arylamidase	－		Hydrolysis (protease) gelatin	－		D-Melibiose	+
Trypsin	－		β-galactosidase (para-nitrophenyl-βD-galactpyranosidase)	+		N-Acetyl-D-Glucosamine	+
α-chymotrypsin	－		assimilation D-glucose	+		N-Acetyl-β-DMannosamine	+
Acid phosphatase	+		Assimilation L-arabinose	－		α-D-Glucose	+
Naphthol-AS-BI-phosphohydrolase	w		Assimilation D-mannose	－		D-Mannose	+
α-galactosidase	+		Assimilation D-mannitol	－		D-Fructose	+
β-galactosidase	+		Assimilation N-acetyl-glucosamine	－		D-Galactose	+
β-glucuronidase	－		Assimilation D-maltose	－		lnosine	+
α-glucosidase	+		Assimilation potassium gluconate	－		Sodium Lactate	+
β-glucosidase	+		Assimilation-Capric acid	－		D-Sorbitol	+
N-acetyl-β-glucosaminidase	－		Assimilation-Adipic acid	－		D-Mannitol	+
α-mannosidase	w		Assimilation malate	+		Glycerol	+
α-fucosidase	－		Assimilation trisodium citrate	－		Pectin	+
			Assimilation phenylacetic acid	－		D-Galacturonic Acid	+
						L-Galactonic Acid Lactone	+
						D-Gluconic Acid	+
						L-Lactic Acid	+
						L-Malic Acid	+
						Lithium Chloride	+
						Potassium Tellurite	+
						Tween 40	+
						β-Hydroxy-D,L Butyric Acid	+
						Acetoacetic Acid	+
						Propionic Acid	+
						Acetic Acid	+
Positive:+; Weak: w; and negitive:-.
Note: only positive results of Biolog GEN III are listed here.
