# Supplementary material for: The metabolic characteristics and environmental adaptations of the intertidal bacterium Palleronia sp. LCG004
Source: Front Microbiol. 2024 Nov 22;15:1469112. doi: 10.3389/fmicb.2024.1469112 (PMC11638410; doi:10.3389/fmicb.2024.1469112)
Supplement: Supplementary file 4 [file Table_3.xlsx]

## Sheet: Sheet1
#Table S3: Cellular fatty acid contents of strain LCG004 and the related species
Fatty acids	1	2	3	4	5
Straight chain:
C16:0	13.26	11.6	4.2	5.1	5.9
C17:0	-	TR	-	7.5	TR
C18:0	3.75	6.3	3.4	9.7	2.7
Unsaturated:
11-methyl C18:1 ω7c	1.29	1.9	-	5.3	TR
C18:1 ω7c	55.77	69.4	68.9	62.9	54.6
C18:1 ω9c	-	-	ND	ND	ND
C19:0 cyclo ω8c	15.78	5.6	12.8	-	26.5
Hydroxy:
C10:0 3-OH	2.68	1.5	5	2.2	2
C12:1 3-OH	-	-	ND	ND	ND
Strains: 1, LCG004; 2, P. sediminis SS33; 3, P. marisminoris DSM 26347; 4, P. soli CAU1105; 5, P. abyssalis CECT 8504
Fatty acids representing <1.0 % in all strains tested are not shown. TR, <1.0 %; ND, no data available; -, not detected. Fatty acids that represented >10.0 % are indicated in bold type.
