# Supplementary material for: The metabolic characteristics and environmental adaptations of the intertidal bacterium Palleronia sp. LCG004
Source: Front Microbiol. 2024 Nov 22;15:1469112. doi: 10.3389/fmicb.2024.1469112 (PMC11638410; doi:10.3389/fmicb.2024.1469112)
Supplement: Supplementary file 5 [file Table_4.xlsx]

## Sheet: Sheet1
#Table S4: The COG classification of strain LCG004 and other twelve Palleronia strains.
	Palleronia sp. LCG004	Oceaniovalibus guishaninsula JLT2003	Palleronia rufa MOLA 401	Palleronia aestuarii DSM 22009	Palleronia sediminis SS33	Palleronia caenipelagi JBTF-M29	Palleronia sp. THAF	Palleronia pontilimi KCTC 52957	Palleronia pelagia DSM 26893	Palleronia marisminoris DSM 26347	Palleronia salina DSM 26892	Palleronia marisminoris CECT 7066	Palleronia abyssalis CECT 8504
C	178	157	180	225	188	203	184	192	233	190	204	177	240
D	37	34	37	44	42	40	34	41	45	42	36	41	51
E	387	259	273	409	285	276	265	300	324	345	317	331	342
F	106	92	95	98	100	89	95	88	97	107	95	106	101
G	278	169	204	318	229	257	220	198	234	297	234	291	255
H	177	135	174	198	171	188	174	181	184	198	180	191	185
I	178	153	158	175	106	169	168	159	169	156	163	154	183
J	207	197	195	205	195	199	202	191	197	208	201	206	197
K	166	101	136	181	136	138	110	127	167	170	139	166	183
L	117	103	127	117	119	134	110	121	126	125	113	123	122
M	165	142	178	188	173	136	177	152	168	192	153	183	204
N	44	38	38	38	34	12	35	34	62	37	39	36	37
O	148	141	138	165	144	133	152	152	167	169	145	154	170
P	197	137	134	214	164	118	150	144	172	189	132	177	238
Q	67	59	62	69	50	60	59	63	78	78	75	78	84
R	259	175	224	259	205	204	222	204	254	262	244	248	274
S	121	109	144	134	124	108	131	136	134	138	120	134	137
T	101	72	85	112	78	81	83	101	111	112	101	107	115
U	34	33	54	54	34	25	39	59	47	42	34	40	71
V	63	54	62	72	56	66	55	59	56	66	53	65	74
W	11	11	12	18	10	3	12	20	13	14	12	14	16
X	24	23	121	62	38	269	20	35	28	28	37	21	59
