# Supplementary material for: The metabolic characteristics and environmental adaptations of the intertidal bacterium Palleronia sp. LCG004
Source: Front Microbiol. 2024 Nov 22;15:1469112. doi: 10.3389/fmicb.2024.1469112 (PMC11638410; doi:10.3389/fmicb.2024.1469112)
Supplement: Supplementary file 6 [file Table_5.xlsx]

## Sheet: Sheet1
#Table S5: Genomic island and prophage regions of strain LCG004.
Genomic island ID	length	start	end
GI1	16356	407053	423408
GI2	61518	528284	589801
GI3	16659	700183	716841
GI4	30391	836388	866778
GI5	16890	1016370	1033259
GI6	11531	1090890	1102420
GI7	28163	1387663	1415825
GI8	20431	2158783	2179213
GI9	13767	2266000	2279766
Prophage ID	length	start	end	Most Common Phage	GC(%)	Completeness
Prophage1	53075	1600080	1653154	PHAGE_Paraco_Shpa_NC_041868(11)	64.52	intact
Prophage2	13432	1658825	1672256	PHAGE_Paraco_vB_PmaS_IMEP1_NC_026608(4)	63.48	intact
Prophage3	16715	1769561	1786275	PHAGE_Brucel_BiPBO1_NC_031264(4)	62.41	intact
