# Supplementary material for: The metabolic characteristics and environmental adaptations of the intertidal bacterium Palleronia sp. LCG004
Source: Front Microbiol. 2024 Nov 22;15:1469112. doi: 10.3389/fmicb.2024.1469112 (PMC11638410; doi:10.3389/fmicb.2024.1469112)
Supplement: Supplementary file 7 [file Table_6.xlsx]

## Sheet: Sheet1
#Table S6: The ANIb values and aligned percentage between strain LCG004 and other strains.
	Palleronia sp. LCG004	P. abyssalis CECT 8504	P. aestuarii DSM 22009	P. caenipelagi JBTF-M29	P. marisminoris CECT 7066	P. marisminoris DSM 26347	P. pelagia DSM 26893	P. pontilimi KCTC 52957	P. rufa MOLA 401	P. salina DSM 26892	P. sediminis SS33	Palleronia sp. THAF1	"Oceaniovalibus" guishaninsula JLT2003
Palleronia sp. LCG004	*	72.25 [44.26]	73.68 [51.45]	70.48 [35.13]	72.78 [42.93]	72.75 [43.11]	74.60 [47.01]	74.92 [47.35]	72.55 [41.16]	74.88 [46.76]	72.53 [41.60]	71.47 [40.58]	71.89 [39.71]
P. abyssalis CECT 8504	72.46 [38.84]	*	72.10 [40.04]	72.00 [36.03]	76.50 [48.78]	76.37 [49.33]	74.16 [44.79]	73.28 [40.86]	74.59 [44.66]	73.89 [42.29]	73.09 [41.04]	74.24 [47.41]	72.13 [34.37]
P. aestuarii DSM 22009	73.52 [43.97]	71.95 [38.29]	*	70.60 [30.58]	72.75 [37.00]	72.77 [37.58]	73.35 [38.91]	73.10 [37.74]	73.16 [36.87]	73.48 [37.75]	72.69 [35.27]	71.53 [34.85]	72.32 [34.01]
P. caenipelagi JBTF-M29	70.32 [34.31]	71.73 [39.95]	70.73 [34.89]	*	72.15 [37.30]	72.14 [37.54]	71.73 [37.91]	71.63 [37.93]	72.66 [39.85]	71.92 [37.49]	71.71 [36.46]	71.64 [39.22]	70.83 [31.72]
P. marisminoris CECT 7066	72.78 [44.25]	76.49 [56.27]	72.82 [44.27]	72.44 [39.15]	*	100.00 [99.54]	73.92 [44.06]	73.55 [42.19]	74.99 [46.22]	74.09 [43.42]	73.56 [44.62]	74.14 [48.87]	72.54 [39.41]
P. marisminoris DSM 26347	72.88 [42.08]	76.41 [54.81]	73.13 [42.89]	72.56 [37.51]	99.89 [95.21]	*	73.90 [42.34]	73.70 [40.52]	74.95 [44.96]	74.06 [41.76]	73.63 [42.98]	74.29 [46.84]	72.53 [38.24]
P. pelagia DSM 26893	75.03 [46.81]	74.42 [49.97]	73.60 [45.45]	72.11 [39.05]	74.14 [42.96]	74.12 [43.33]	*	78.09 [60.04]	74.14 [47.12]	95.44 [81.10]	73.90 [43.64]	73.42 [47.11]	73.98 [38.90]
P. pontilimi KCTC 52957	75.29 [47.64]	73.39 [47.07]	73.66 [44.11]	72.01 [39.40]	73.80 [41.75]	73.79 [41.80]	78.28 [61.03]	*	74.38 [47.09]	78.54 [59.74]	73.77 [43.98]	73.22 [46.40]	73.93 [39.55]
P. rufa MOLA 401	72.94 [40.43]	74.82 [49.23]	73.91 [42.98]	73.14 [40.53]	75.33 [44.43]	75.30 [44.58]	74.22 [45.96]	74.52 [44.54]	*	74.52 [43.44]	74.71 [43.29]	74.48 [47.97]	73.71 [38.47]
P. salina DSM 26892	75.37 [49.72]	74.17 [50.45]	74.03 [46.00]	72.23 [41.39]	74.56 [45.01]	74.56 [45.04]	95.82 [86.31]	78.63 [62.45]	74.54 [47.59]	*	74.43 [46.15]	73.57 [49.09]	74.13 [40.49]
P. sediminis SS33	73.24 [43.16]	73.64 [49.02]	73.18 [43.47]	72.25 [39.72]	74.10 [46.07]	74.10 [46.09]	74.35 [45.98]	74.24 [46.39]	74.68 [47.25]	74.66 [45.69]	*	72.76 [44.49]	74.37 [42.69]
Palleronia sp. THAF1	71.69 [47.26]	74.21 [62.04]	71.64 [47.56]	71.85 [46.38]	74.36 [55.49]	74.33 [55.67]	73.32 [54.88]	73.16 [53.11]	74.11 [56.97]	73.29 [54.08]	72.38 [48.49]	*	71.86 [42.49]
Oceaniovalibus guishaninsula JLT2003	72.52 [49.08]	72.64 [48.46]	73.06 [49.93]	71.34 [41.86]	72.83 [48.65]	72.79 [48.97]	74.16 [48.50]	74.28 [49.20]	73.60 [50.56]	74.22 [47.89]	74.22 [50.35]	71.97 [46.50]	*
