# Supplementary material for: The metabolic characteristics and environmental adaptations of the intertidal bacterium Palleronia sp. LCG004
Source: Front Microbiol. 2024 Nov 22;15:1469112. doi: 10.3389/fmicb.2024.1469112 (PMC11638410; doi:10.3389/fmicb.2024.1469112)
Supplement: Supplementary file 8 [file Table_7.xlsx]

## Sheet: DDH_table
#Table S7: The dDDH values between strain LCG004 and other strains.
	Palleronia sp. LCG004	P. abyssalis CECT 8504	P. aestuarii DSM 22009	P. caenipelagi JBTF-M29	P. marisminoris CECT 7066	P. marisminoris DSM 26347	P. pelagia DSM 26893	P. pontilimi KCTC 52957	P. rufa MOLA 401	P. salina DSM 26892	P. sediminis SS33	Palleronia sp. THAF1	Oceaniovalibus guishaninsula JLT2003
Palleronia sp. LCG004	-	15.4	17.3	13.7	16.1	16	17.8	17.8	15.3	18	16.3	14.6	15.5
P. abyssalis CECT 8504	15.4	-	14.9	14.3	21.6	21.4	17.9	16.8	17	17.9	16.6	18.2	15.3
P. aestuarii DSM 22009	17.3	14.9	-	13.7	15.5	15.5	15.8	15.5	15.4	16.1	15.7	14.2	14.9
P. caenipelagi JBTF-M29	13.7	14.3	13.7	-	14.5	14.5	14.6	14.6	14.7	14.7	14.5	14.2	13.9
P. marisminoris CECT 7066	16.1	21.6	15.5	14.5	-	99.3	17.6	16.9	18.3	18.4	18.1	17.7	15.7
P. marisminoris DSM 26347	16	21.4	15.5	14.5	99.3	-	17.5	16.8	18.2	18.3	17.9	17.6	15.6
P. pelagia DSM 26893	17.8	17.9	15.8	14.6	17.6	17.5	-	30.3	17.5	76.8	17.8	17.1	17
P. pontilimi KCTC 52957	17.8	16.8	15.5	14.6	16.9	16.8	30.3	-	18.1	31.2	17.9	16.7	17.1
P. rufa MOLA 401	15.3	17	15.4	14.7	18.3	18.2	17.5	18.1	-	18	17.7	17.1	16.6
P. salina DSM 26892	18	17.9	16.1	14.7	18.4	18.3	76.8	31.2	18	-	18.6	17.1	17.2
P. sediminis SS33	16.3	16.6	15.7	14.5	18.1	17.9	17.8	17.9	17.7	18.6	-	15.4	18.1
Palleronia sp. THAF1	14.6	18.2	14.2	14.2	17.7	17.6	17.1	16.7	17.1	17.1	15.4	-	15
Oceaniovalibus guishaninsula JLT2003	15.5	15.3	14.9	13.9	15.7	15.6	17	17.1	16.6	17.2	18.1	15	-
