# Supplementary material for: The metabolic characteristics and environmental adaptations of the intertidal bacterium Palleronia sp. LCG004
Source: Front Microbiol. 2024 Nov 22;15:1469112. doi: 10.3389/fmicb.2024.1469112 (PMC11638410; doi:10.3389/fmicb.2024.1469112)
Supplement: Supplementary file 9 [file Table_8.xlsx]

## Sheet: Sheet1
#Table S8: Predicted genes related to substrate transports in strain LCG004.
Gene ID	Specificity	NCBI annotation	KEGG number	KEGG annotation	Chromosome/Plasmid
#Amino acid and peptide
RVY76_RS00925		ABC transporter substrate-binding protein	K01999	branched-chain amino acid transport system substrate-binding protein	chromosome
RVY76_RS00930		branched-chain amino acid ABC transporter permease	K01997	branched-chain amino acid transport system permease protein	chromosome
RVY76_RS00935		branched-chain amino acid ABC transporter permease	K01998	branched-chain amino acid transport system permease protein	chromosome
RVY76_RS00940		ABC transporter ATP-binding protein	K01995	branched-chain amino acid transport system ATP-binding protein	chromosome
RVY76_RS00945		ABC transporter ATP-binding protein	K01996	branched-chain amino acid transport system ATP-binding protein	chromosome
RVY76_RS01195		BMP family ABC transporter substrate-binding protein	K07335	basic membrane protein A and related proteins	chromosome
RVY76_RS01685		amino acid ABC transporter substrate-binding protein	K09969	general L-amino acid transport system substrate-binding protein	chromosome
RVY76_RS01690		ABC transporter permease subunit	K09970	general L-amino acid transport system permease protein	chromosome
RVY76_RS01695		amino acid ABC transporter permease	K09971	general L-amino acid transport system permease protein	chromosome
RVY76_RS01700		amino acid ABC transporter ATP-binding protein	K09972	general L-amino acid transport system ATP-binding protein [EC:7.4.2.1]	chromosome
RVY76_RS02745		amino acid ABC transporter ATP-binding protein			chromosome
RVY76_RS02750		amino acid ABC transporter permease	K16962	putative S-methylcysteine transport system permease protein	chromosome
RVY76_RS02755		transporter substrate-binding domain-containing protein			chromosome
RVY76_RS03280		amino acid ABC transporter ATP-binding protein	K02028	polar amino acid transport system ATP-binding protein [EC:7.4.2.1]	chromosome
RVY76_RS03285		amino acid ABC transporter permease	K02029	polar amino acid transport system permease protein	chromosome
RVY76_RS03290		amino acid ABC transporter permease	K02029	polar amino acid transport system permease protein	chromosome
RVY76_RS03295		transporter substrate-binding domain-containing protein			chromosome
RVY76_RS03380		amino acid ABC transporter ATP-binding protein	K02028	polar amino acid transport system ATP-binding protein [EC:7.4.2.1]	chromosome
RVY76_RS03385		amino acid ABC transporter permease	K02029	polar amino acid transport system permease protein	chromosome
RVY76_RS03390		amino acid ABC transporter permease	K02029	polar amino acid transport system permease protein	chromosome
RVY76_RS03395		transporter substrate-binding domain-containing protein	K02030	polar amino acid transport system substrate-binding protein	chromosome
RVY76_RS03430		ABC transporter substrate-binding protein	K02035	peptide/nickel transport system substrate-binding protein	chromosome
RVY76_RS03435		ABC transporter permease	K02033	peptide/nickel transport system permease protein	chromosome
RVY76_RS03440		ABC transporter permease	K02034	peptide/nickel transport system permease protein	chromosome
RVY76_RS03445		ABC transporter ATP-binding protein	K02031	peptide/nickel transport system ATP-binding protein	chromosome
RVY76_RS03450		ATP-binding cassette domain-containing protein	K02032	peptide/nickel transport system ATP-binding protein	chromosome
RVY76_RS04845		ABC transporter permease	K02034	peptide/nickel transport system permease protein	chromosome
RVY76_RS04850		ABC transporter permease	K02033	peptide/nickel transport system permease protein	chromosome
RVY76_RS04855		ABC transporter substrate-binding protein	K02035	peptide/nickel transport system substrate-binding protein	chromosome
RVY76_RS04865		ABC transporter ATP-binding protein	K02032	peptide/nickel transport system ATP-binding protein	chromosome
RVY76_RS04870		ABC transporter ATP-binding protein	K02032	peptide/nickel transport system ATP-binding protein	chromosome
RVY76_RS04875		ABC transporter substrate-binding protein	K02035	peptide/nickel transport system substrate-binding protein	chromosome
RVY76_RS04880		ABC transporter permease	K02033	peptide/nickel transport system permease protein	chromosome
RVY76_RS04885		ABC transporter permease	K02034	peptide/nickel transport system permease protein	chromosome
RVY76_RS05340		branched-chain amino acid ABC transporter permease	K01998	branched-chain amino acid transport system permease protein	chromosome
RVY76_RS05345		branched-chain amino acid ABC transporter permease	K01997	branched-chain amino acid transport system permease protein	chromosome
RVY76_RS05350		ABC transporter ATP-binding protein	K01996	branched-chain amino acid transport system ATP-binding protein	chromosome
RVY76_RS05365		ABC transporter substrate-binding protein	K01999	branched-chain amino acid transport system substrate-binding protein	chromosome
RVY76_RS06595		ABC transporter substrate-binding protein	K02035	peptide/nickel transport system substrate-binding protein	chromosome
RVY76_RS06605		ABC transporter permease	K02033	peptide/nickel transport system permease protein	chromosome
RVY76_RS06610		ABC transporter permease	K02034	peptide/nickel transport system permease protein	chromosome
RVY76_RS06615		ABC transporter ATP-binding protein	K02032	peptide/nickel transport system ATP-binding protein	chromosome
RVY76_RS06795		ABC transporter permease	K02034	peptide/nickel transport system permease protein	chromosome
RVY76_RS06805		ABC transporter substrate-binding protein			chromosome
RVY76_RS06810		ABC transporter permease	K02033	peptide/nickel transport system permease protein	chromosome
RVY76_RS06820		ABC transporter ATP-binding protein	K02032	peptide/nickel transport system ATP-binding protein	chromosome
RVY76_RS07020		dipeptide/oligopeptide/nickel ABC transporter ATP-binding protein	K02032	peptide/nickel transport system ATP-binding protein	chromosome
RVY76_RS07025		ABC transporter ATP-binding protein	K02031	peptide/nickel transport system ATP-binding protein	chromosome
RVY76_RS07030		ABC transporter permease	K02034	peptide/nickel transport system permease protein	chromosome
RVY76_RS07035		ABC transporter permease	K02033	peptide/nickel transport system permease protein	chromosome
RVY76_RS07040		ABC transporter substrate-binding protein	K02035	peptide/nickel transport system substrate-binding protein	chromosome
RVY76_RS10230		ABC transporter ATP-binding protein	K01996	branched-chain amino acid transport system ATP-binding protein	chromosome
RVY76_RS10235		ABC transporter substrate-binding protein	K01999	branched-chain amino acid transport system substrate-binding protein	chromosome
RVY76_RS10240		branched-chain amino acid ABC transporter permease	K01998	branched-chain amino acid transport system permease protein	chromosome
RVY76_RS10245		branched-chain amino acid ABC transporter permease	K01997	branched-chain amino acid transport system permease protein	chromosome
RVY76_RS10255		ABC transporter ATP-binding protein	K01995	branched-chain amino acid transport system ATP-binding protein	chromosome
RVY76_RS11540		amino acid ABC transporter ATP-binding protein	K02028	polar amino acid transport system ATP-binding protein [EC:7.4.2.1]	chromosome
RVY76_RS11545		transporter substrate-binding domain-containing protein	K02030	polar amino acid transport system substrate-binding protein	chromosome
RVY76_RS11550		ABC transporter permease subunit	K02029	polar amino acid transport system permease protein	chromosome
RVY76_RS11555		ABC transporter permease subunit	K02029	polar amino acid transport system permease protein	chromosome
RVY76_RS11815		peptide ABC transporter substrate-binding protein	K15580	oligopeptide transport system substrate-binding protein	chromosome
RVY76_RS11820		oligopeptide ABC transporter permease OppB	K15581	oligopeptide transport system permease protein	chromosome
RVY76_RS11825		ABC transporter permease subunit	K15582	oligopeptide transport system permease protein	chromosome
RVY76_RS11830		ATP-binding cassette domain-containing protein	K15583	oligopeptide transport system ATP-binding protein	chromosome
RVY76_RS11835		ATP-binding cassette domain-containing protein	K10823	oligopeptide transport system ATP-binding protein	chromosome
RVY76_RS12775		ABC transporter substrate-binding protein	K02035	peptide/nickel transport system substrate-binding protein	chromosome
RVY76_RS12780		ABC transporter ATP-binding protein	K02031	peptide/nickel transport system ATP-binding protein	chromosome
RVY76_RS12785		dipeptide ABC transporter ATP-binding protein	K02032	peptide/nickel transport system ATP-binding protein	chromosome
RVY76_RS12790		ABC transporter substrate-binding protein	K02035	peptide/nickel transport system substrate-binding protein	chromosome
RVY76_RS12795		ABC transporter substrate-binding protein	K02035	peptide/nickel transport system substrate-binding protein	chromosome
RVY76_RS12800		ABC transporter permease	K02033	peptide/nickel transport system permease protein	chromosome
RVY76_RS12805		ABC transporter permease	K02034	peptide/nickel transport system permease protein	chromosome
RVY76_RS12875		alanine/glycine:cation symporter family protein	K03310	alanine or glycine:cation symporter, AGCS family	chromosome
RVY76_RS13870		DMT family transporter	K15270	S-adenosylmethionine uptake transporter	chromosome
RVY76_RS14470		ATP-binding cassette domain-containing protein	K01996	branched-chain amino acid transport system ATP-binding protein	plasmid unnamed1
RVY76_RS14475		ABC transporter ATP-binding protein	K01995	branched-chain amino acid transport system ATP-binding protein	plasmid unnamed1
RVY76_RS14480		branched-chain amino acid ABC transporter permease	K01998	branched-chain amino acid transport system permease protein	plasmid unnamed1
RVY76_RS14485		branched-chain amino acid ABC transporter permease	K01997	branched-chain amino acid transport system permease protein	plasmid unnamed1
RVY76_RS14490		ABC transporter substrate-binding protein	K01999	branched-chain amino acid transport system substrate-binding protein	plasmid unnamed1
RVY76_RS14645		ABC transporter substrate-binding protein	K02035	peptide/nickel transport system substrate-binding protein	plasmid unnamed1
RVY76_RS14650		ABC transporter permease	K02033	peptide/nickel transport system permease protein	plasmid unnamed1
RVY76_RS14655		ABC transporter permease	K02034	peptide/nickel transport system permease protein	plasmid unnamed1
RVY76_RS14665		ABC transporter ATP-binding protein	K02031	peptide/nickel transport system ATP-binding protein	plasmid unnamed1
RVY76_RS14670		ABC transporter ATP-binding protein	K02032	peptide/nickel transport system ATP-binding protein	plasmid unnamed1
RVY76_RS14895		amino acid ABC transporter ATP-binding protein	K02028	polar amino acid transport system ATP-binding protein [EC:7.4.2.1]	plasmid unnamed1
RVY76_RS14900		amino acid ABC transporter permease			plasmid unnamed1
RVY76_RS14905		amino acid ABC transporter permease	K02029	polar amino acid transport system permease protein	plasmid unnamed1
RVY76_RS14920		transporter substrate-binding domain-containing protein			plasmid unnamed1
RVY76_RS14945		amino acid ABC transporter permease	K02029	polar amino acid transport system permease protein	plasmid unnamed1
RVY76_RS14950		amino acid ABC transporter permease	K02029	polar amino acid transport system permease protein	plasmid unnamed1
RVY76_RS14955		transporter substrate-binding domain-containing protein	K02030	polar amino acid transport system substrate-binding protein	plasmid unnamed1
RVY76_RS14965		amino acid ABC transporter ATP-binding protein	K02028	polar amino acid transport system ATP-binding protein [EC:7.4.2.1]	plasmid unnamed1
RVY76_RS15465		ATP-binding cassette domain-containing protein	K02032	peptide/nickel transport system ATP-binding protein	plasmid unnamed1
RVY76_RS15470		ABC transporter ATP-binding protein	K02031	peptide/nickel transport system ATP-binding protein	plasmid unnamed1
RVY76_RS15475		ABC transporter permease	K02034	peptide/nickel transport system permease protein	plasmid unnamed1
RVY76_RS15480		ABC transporter permease	K02033	peptide/nickel transport system permease protein	plasmid unnamed1
RVY76_RS15485		ABC transporter substrate-binding protein	K02035	peptide/nickel transport system substrate-binding protein	plasmid unnamed1
RVY76_RS15680		sodium/proline symporter PutP	K03307	solute:Na+ symporter, SSS family	plasmid unnamed1
RVY76_RS15705		ABC transporter substrate-binding protein	K02035	peptide/nickel transport system substrate-binding protein	plasmid unnamed1
RVY76_RS15710		ABC transporter permease	K02033	peptide/nickel transport system permease protein	plasmid unnamed1
RVY76_RS15715		ABC transporter permease	K02034	peptide/nickel transport system permease protein	plasmid unnamed1
RVY76_RS15720		ATP-binding cassette domain-containing protein	K02032	peptide/nickel transport system ATP-binding protein	plasmid unnamed1
RVY76_RS15725		ABC transporter ATP-binding protein	K02031	peptide/nickel transport system ATP-binding protein	plasmid unnamed1
RVY76_RS15765		alanine/glycine:cation symporter family protein	K03310	alanine or glycine:cation symporter, AGCS family	plasmid unnamed1
RVY76_RS15795		amino acid ABC transporter ATP-binding protein	K02028	polar amino acid transport system ATP-binding protein [EC:7.4.2.1]	plasmid unnamed1
RVY76_RS15800		amino acid ABC transporter permease	K02029	polar amino acid transport system permease protein	plasmid unnamed1
RVY76_RS15805		amino acid ABC transporter permease	K02029	polar amino acid transport system permease protein	plasmid unnamed1
RVY76_RS15810		transporter substrate-binding domain-containing protein	K02030	polar amino acid transport system substrate-binding protein	plasmid unnamed1
RVY76_RS16090		ABC transporter permease	K02033	peptide/nickel transport system permease protein	plasmid unnamed1
RVY76_RS16095		ABC transporter permease	K02034	peptide/nickel transport system permease protein	plasmid unnamed1
RVY76_RS16100		ABC transporter ATP-binding protein	K02031	peptide/nickel transport system ATP-binding protein	plasmid unnamed1
RVY76_RS16105		ABC transporter ATP-binding protein	K02032	peptide/nickel transport system ATP-binding protein	plasmid unnamed1
RVY76_RS16115		ABC transporter substrate-binding protein	K02035	peptide/nickel transport system substrate-binding protein	plasmid unnamed1
RVY76_RS16390		ABC transporter ATP-binding protein	K02032	peptide/nickel transport system ATP-binding protein	plasmid unnamed2
RVY76_RS16395		peptide ABC transporter substrate-binding protein	K02035	peptide/nickel transport system substrate-binding protein	plasmid unnamed2
RVY76_RS16400		ABC transporter permease	K02033	peptide/nickel transport system permease protein	plasmid unnamed2
RVY76_RS16405		ABC transporter permease	K02034	peptide/nickel transport system permease protein	plasmid unnamed2
RVY76_RS16725		ABC transporter substrate-binding protein	K02035	peptide/nickel transport system substrate-binding protein	plasmid unnamed2
RVY76_RS16730		ABC transporter permease	K02033	peptide/nickel transport system permease protein	plasmid unnamed2
RVY76_RS16735		ABC transporter permease	K02034	peptide/nickel transport system permease protein	plasmid unnamed2
RVY76_RS16740		ABC transporter ATP-binding protein	K02031	peptide/nickel transport system ATP-binding protein	plasmid unnamed2
RVY76_RS16745		ABC transporter ATP-binding protein	K02032	peptide/nickel transport system ATP-binding protein	plasmid unnamed2
RVY76_RS16725		ABC transporter substrate-binding protein	K02035	peptide/nickel transport system substrate-binding protein	plasmid unnamed2
RVY76_RS16730		ABC transporter permease	K02033	peptide/nickel transport system permease protein	plasmid unnamed2
RVY76_RS16735		ABC transporter permease	K02034	peptide/nickel transport system permease protein	plasmid unnamed2
RVY76_RS16740		ABC transporter ATP-binding protein	K02031	peptide/nickel transport system ATP-binding protein	plasmid unnamed2
RVY76_RS16745		ABC transporter ATP-binding protein	K02032	peptide/nickel transport system ATP-binding protein	plasmid unnamed2
RVY76_RS17505		ABC transporter permease	K13891	glutathione transport system permease protein	plasmid unnamed3
RVY76_RS17510		ABC transporter permease	K13890	glutathione transport system permease protein	plasmid unnamed3
RVY76_RS17515		ABC transporter substrate-binding protein	K13889	glutathione transport system substrate-binding protein	plasmid unnamed3
RVY76_RS17530		ABC transporter ATP-binding protein	K02031	peptide/nickel transport system ATP-binding protein	plasmid unnamed3
RVY76_RS17535		ATP-binding cassette domain-containing protein	K02032	peptide/nickel transport system ATP-binding protein	plasmid unnamed3
RVY76_RS17760		ABC transporter ATP-binding protein	K01996	branched-chain amino acid transport system ATP-binding protein	plasmid unnamed3
RVY76_RS17765		ABC transporter ATP-binding protein	K01995	branched-chain amino acid transport system ATP-binding protein	plasmid unnamed3
RVY76_RS17770		branched-chain amino acid ABC transporter permease	K01998	branched-chain amino acid transport system permease protein	plasmid unnamed3
RVY76_RS17775		branched-chain amino acid ABC transporter permease	K01997	branched-chain amino acid transport system permease protein	plasmid unnamed3
RVY76_RS17780		ABC transporter substrate-binding protein	K01999	branched-chain amino acid transport system substrate-binding protein	plasmid unnamed3
RVY76_RS17930		ABC transporter substrate-binding protein	K02035	peptide/nickel transport system substrate-binding protein	plasmid unnamed3
RVY76_RS17935		ABC transporter permease	K02033	peptide/nickel transport system permease protein	plasmid unnamed3
RVY76_RS17940		dipeptide/oligopeptide/nickel ABC transporter permease/ATP-binding protein	K02034	peptide/nickel transport system permease protein	plasmid unnamed3
RVY76_RS17945		ABC transporter ATP-binding protein	K02032	peptide/nickel transport system ATP-binding protein	plasmid unnamed3
#Carbohydrate
RVY76_RS00380		ABC transporter permease	K10440	ribose transport system permease protein	chromosome
RVY76_RS00385		ABC transporter permease	K10440	ribose transport system permease protein	chromosome
RVY76_RS00390		sugar ABC transporter ATP-binding protein	K10441	ribose transport system ATP-binding protein [EC:7.5.2.7]	chromosome
RVY76_RS00395		sugar ABC transporter substrate-binding protein	K10439	ribose transport system substrate-binding protein	chromosome
RVY76_RS02335		PTS sugar transporter subunit IIA	K02793	mannose PTS system EIIA component [EC:2.7.1.191]	chromosome
RVY76_RS03190		GntP family permease	K03299	gluconate:H+ symporter, GntP family	chromosome
RVY76_RS03235		ABC transporter ATP-binding protein	K17324	glycerol transport system ATP-binding protein	chromosome
RVY76_RS03240		ABC transporter ATP-binding protein	K17325	glycerol transport system ATP-binding protein	chromosome
RVY76_RS03245		sugar ABC transporter permease	K17322	glycerol transport system permease protein	chromosome
RVY76_RS03250		carbohydrate ABC transporter permease	K17323	glycerol transport system permease protein	chromosome
RVY76_RS03260		ABC transporter substrate-binding protein	K17321	glycerol transport system substrate-binding protein	chromosome
RVY76_RS04095		sugar ABC transporter permease			chromosome
RVY76_RS04100		multiple monosaccharide ABC transporter ATP-binding protein			chromosome
RVY76_RS04105		multiple monosaccharide ABC transporter substrate-binding protein			chromosome
RVY76_RS05210		sugar ABC transporter ATP-binding protein	K10441	ribose transport system ATP-binding protein [EC:7.5.2.7]	chromosome
RVY76_RS05215		ABC transporter permease	K10440	ribose transport system permease protein	chromosome
RVY76_RS05220		ABC transporter substrate-binding protein	K10439	ribose transport system substrate-binding protein	chromosome
RVY76_RS05565		sn-glycerol-3-phosphate ABC transporter ATP-binding protein UgpC	K10235	alpha-glucoside transport system ATP-binding protein	chromosome
RVY76_RS05575		carbohydrate ABC transporter permease	K10234	alpha-glucoside transport system permease protein	chromosome
RVY76_RS05580		sugar ABC transporter permease	K10233	alpha-glucoside transport system permease protein	chromosome
RVY76_RS05585		ABC transporter substrate-binding protein	K10232	alpha-glucoside transport system substrate-binding protein	chromosome
RVY76_RS05820		ABC transporter substrate-binding protein	K10439	ribose transport system substrate-binding protein	chromosome
RVY76_RS05825		ABC transporter permease	K10440	ribose transport system permease protein	chromosome
RVY76_RS05830		sugar ABC transporter ATP-binding protein	K10441	ribose transport system ATP-binding protein [EC:7.5.2.7]	chromosome
RVY76_RS07055		ATP-binding cassette domain-containing protein	K10545	D-xylose transport system ATP-binding protein [EC:7.5.2.10]	chromosome
RVY76_RS07060		sugar ABC transporter permease	K10544	D-xylose transport system permease protein	chromosome
RVY76_RS07065		D-xylose ABC transporter substrate-binding protein	K10543	D-xylose transport system substrate-binding protein	chromosome
RVY76_RS12570		extracellular solute-binding protein	K02027	multiple sugar transport system substrate-binding protein	chromosome
RVY76_RS12575		sugar ABC transporter permease	K02025	multiple sugar transport system permease protein	chromosome
RVY76_RS12580		carbohydrate ABC transporter permease	K02026	multiple sugar transport system permease protein	chromosome
RVY76_RS12585		sn-glycerol-3-phosphate ABC transporter ATP-binding protein UgpC	K10111	multiple sugar transport system ATP-binding protein [EC:7.5.2.-]	chromosome
RVY76_RS12625		ABC transporter substrate-binding protein	K17241	alpha-1,4-digalacturonate transport system substrate-binding protein	chromosome
RVY76_RS12635		sn-glycerol-3-phosphate ABC transporter ATP-binding protein UgpC	K10111	multiple sugar transport system ATP-binding protein [EC:7.5.2.-]	chromosome
RVY76_RS12640		sugar ABC transporter permease	K17242	alpha-1,4-digalacturonate transport system permease protein	chromosome
RVY76_RS12645		carbohydrate ABC transporter permease	K17243	alpha-1,4-digalacturonate transport system permease protein	chromosome
RVY76_RS12725		ABC transporter substrate-binding protein	K25676	pectin-derived oligosaccharide transport system substrate-binding protein	chromosome
RVY76_RS12730		sugar ABC transporter permease	K25677	pectin-derived oligosaccharide transport system permease protein	chromosome
RVY76_RS12735		carbohydrate ABC transporter permease	K25678	pectin-derived oligosaccharide transport system permease protein	chromosome
RVY76_RS12750		sn-glycerol-3-phosphate ABC transporter ATP-binding protein UgpC	K10111	multiple sugar transport system ATP-binding protein [EC:7.5.2.-]	chromosome
RVY76_RS13275		PTS sugar transporter subunit IIA	K02806	nitrogen PTS system EIIA component [EC:2.7.1.-]	chromosome
RVY76_RS14530		sn-glycerol-3-phosphate ABC transporter ATP-binding protein UgpC	K10111	multiple sugar transport system ATP-binding protein [EC:7.5.2.-]	plasmid unnamed1
RVY76_RS14540		carbohydrate ABC transporter permease	K10119	raffinose/stachyose/melibiose transport system permease protein	plasmid unnamed1
RVY76_RS14545		sugar ABC transporter permease	K10118	raffinose/stachyose/melibiose transport system permease protein	plasmid unnamed1
RVY76_RS14550		extracellular solute-binding protein	K10117	raffinose/stachyose/melibiose transport system substrate-binding protein	plasmid unnamed1
RVY76_RS15520		ABC transporter permease	K10561	rhamnose transport system permease protein	plasmid unnamed1
RVY76_RS15525		ABC transporter permease	K10560	rhamnose transport system permease protein	plasmid unnamed1
RVY76_RS15530		sugar ABC transporter ATP-binding protein	K10562	rhamnose transport system ATP-binding protein [EC:7.5.2.-]	plasmid unnamed1
RVY76_RS15535		rhamnose ABC transporter substrate-binding protein	K10559	rhamnose transport system substrate-binding protein	plasmid unnamed1
RVY76_RS15635		ABC transporter ATP-binding protein	K10111	multiple sugar transport system ATP-binding protein [EC:7.5.2.-]	plasmid unnamed1
RVY76_RS15640		carbohydrate ABC transporter permease	K10229	polyol transport system permease protein	plasmid unnamed1
RVY76_RS15645		sugar ABC transporter permease	K10228	polyol transport system permease protein	plasmid unnamed1
RVY76_RS15650		sugar ABC transporter substrate-binding protein	K10227	polyol transport system substrate-binding protein	plasmid unnamed1
RVY76_RS15885		sugar ABC transporter substrate-binding protein			plasmid unnamed1
RVY76_RS15890		sugar ABC transporter permease	K02025	multiple sugar transport system permease protein	plasmid unnamed1
RVY76_RS15895		carbohydrate ABC transporter permease	K02026	multiple sugar transport system permease protein	plasmid unnamed1
RVY76_RS15900		sn-glycerol-3-phosphate ABC transporter ATP-binding protein UgpC	K10112	multiple sugar transport system ATP-binding protein [EC:7.5.2.-]	plasmid unnamed1
RVY76_RS16215		substrate-binding domain-containing protein	K10439	ribose transport system substrate-binding protein	plasmid unnamed1
RVY76_RS16220		ATP-binding cassette domain-containing protein	K10441	ribose transport system ATP-binding protein [EC:7.5.2.7]	plasmid unnamed1
RVY76_RS16225		ABC transporter permease	K10440	ribose transport system permease protein	plasmid unnamed1
RVY76_RS16535		sugar ABC transporter ATP-binding protein	K10441	ribose transport system ATP-binding protein [EC:7.5.2.7]	plasmid unnamed2
RVY76_RS16540		ABC transporter permease	K10440	ribose transport system permease protein	plasmid unnamed2
RVY76_RS16545		ABC transporter substrate-binding protein	K10439	ribose transport system substrate-binding protein	plasmid unnamed2
RVY76_RS16590		ABC transporter ATP-binding protein	K10112	multiple sugar transport system ATP-binding protein [EC:7.5.2.-]	plasmid unnamed2
RVY76_RS16595		sugar ABC transporter substrate-binding protein	K02027	multiple sugar transport system substrate-binding protein	plasmid unnamed2
RVY76_RS16600		sugar ABC transporter permease	K02025	multiple sugar transport system permease protein	plasmid unnamed2
RVY76_RS16605		carbohydrate ABC transporter permease	K02026	multiple sugar transport system permease protein	plasmid unnamed2
RVY76_RS16715		extracellular solute-binding protein	K10117	raffinose/stachyose/melibiose transport system substrate-binding protein	plasmid unnamed2
RVY76_RS16805		sugar ABC transporter ATP-binding protein	K10441	ribose transport system ATP-binding protein [EC:7.5.2.7]	plasmid unnamed2
RVY76_RS16810		ABC transporter permease	K10440	ribose transport system permease protein	plasmid unnamed2
RVY76_RS16815		ABC transporter substrate-binding protein	K10439	ribose transport system substrate-binding protein	plasmid unnamed2
RVY76_RS16875		ABC transporter permease	K10440	ribose transport system permease protein	plasmid unnamed2
RVY76_RS16880		sugar ABC transporter ATP-binding protein	K10441	ribose transport system ATP-binding protein [EC:7.5.2.7]	plasmid unnamed2
RVY76_RS16885		substrate-binding domain-containing protein	K10439	ribose transport system substrate-binding protein	plasmid unnamed2
#Organic acid
RVY76_RS00735		AEC family transporter	K24180	malate permease and related proteins	chromosome
RVY76_RS03215		tripartite tricarboxylate transporter substrate binding protein			chromosome
RVY76_RS03220		tripartite tricarboxylate transporter TctB family protein	K07794	putative tricarboxylic transport membrane protein	chromosome
RVY76_RS03225		tripartite tricarboxylate transporter permease	K07793	putative tricarboxylic transport membrane protein	chromosome
RVY76_RS04085		tripartite tricarboxylate transporter permease	K07793	putative tricarboxylic transport membrane protein	chromosome
RVY76_RS04895		tripartite tricarboxylate transporter permease	K07793	putative tricarboxylic transport membrane protein	chromosome
RVY76_RS04900		tripartite tricarboxylate transporter TctB family protein	K07794	putative tricarboxylic transport membrane protein	chromosome
RVY76_RS04905		tripartite tricarboxylate transporter substrate-binding protein	K07795	putative tricarboxylic transport membrane protein	chromosome
RVY76_RS06360		TRAP transporter large permease subunit	K11690	C4-dicarboxylate transporter, DctM subunit	chromosome
RVY76_RS06365		TRAP transporter small permease			chromosome
RVY76_RS06370		TRAP transporter substrate-binding protein	K21395	TRAP-type transport system periplasmic protein	chromosome
RVY76_RS06995		TRAP transporter large permease	K11690	C4-dicarboxylate transporter, DctM subunit	chromosome
RVY76_RS07000		TRAP transporter small permease	K21394	TRAP-type transport system small permease protein	chromosome
RVY76_RS07005		TRAP transporter substrate-binding protein	K21395	TRAP-type transport system periplasmic protein	chromosome
RVY76_RS07940		TRAP transporter large permease	K21393	TRAP-type transport system large permease protein	chromosome
RVY76_RS07945		TRAP transporter small permease subunit	K11689	C4-dicarboxylate transporter, DctQ subunit	chromosome
RVY76_RS07950		TRAP transporter substrate-binding protein DctP	K21395	TRAP-type transport system periplasmic protein	chromosome
RVY76_RS08970		TRAP transporter large permease subunit			chromosome
RVY76_RS08975		C4-dicarboxylate ABC transporter permease			chromosome
RVY76_RS08980		TRAP transporter substrate-binding protein			chromosome
RVY76_RS09355		TRAP transporter substrate-binding protein	K21395	TRAP-type transport system periplasmic protein	chromosome
RVY76_RS09360		TRAP transporter small permease			chromosome
RVY76_RS09365		TRAP transporter large permease	K11690	C4-dicarboxylate transporter, DctM subunit	chromosome
RVY76_RS10515		tripartite tricarboxylate transporter permease	K07793	putative tricarboxylic transport membrane protein	chromosome
RVY76_RS10520		tripartite tricarboxylate transporter TctB family protein	K07794	putative tricarboxylic transport membrane protein	chromosome
RVY76_RS10525		tripartite tricarboxylate transporter substrate binding protein	K07795	putative tricarboxylic transport membrane protein	chromosome
RVY76_RS10910		AEC family transporter	K13936	malonate transporter and related proteins	chromosome
RVY76_RS11185		AEC family transporter	K13936	malonate transporter and related proteins	chromosome
RVY76_RS13310		formate/nitrite transporter family protein	K21990	formate-nitrite transporter family protein	chromosome
RVY76_RS13595		AEC family transporter	K13936	malonate transporter and related proteins	chromosome
RVY76_RS13790		TRAP transporter large permease subunit			chromosome
RVY76_RS13795		TRAP transporter small permease subunit	K11689	C4-dicarboxylate transporter, DctQ subunit	chromosome
RVY76_RS13800		TRAP transporter substrate-binding protein	K21395	TRAP-type transport system periplasmic protein	chromosome
RVY76_RS15275		tripartite tricarboxylate transporter permease	K07793	putative tricarboxylic transport membrane protein	plasmid unnamed1
RVY76_RS15280		tripartite tricarboxylate transporter TctB family protein	K07794	putative tricarboxylic transport membrane protein	plasmid unnamed1
RVY76_RS15285		tripartite tricarboxylate transporter substrate-binding protein	K07795	putative tricarboxylic transport membrane protein	plasmid unnamed1
RVY76_RS15300		formate/nitrite transporter family protein	K21993	formate transporter	plasmid unnamed1
RVY76_RS15675		TIGR00366 family protein	K02106	short-chain fatty acids transporter	plasmid unnamed1
RVY76_RS15685		sodium:solute symporter family protein	K14393	cation/acetate symporter	plasmid unnamed1
RVY76_RS15830		tripartite tricarboxylate transporter substrate binding protein			plasmid unnamed1
RVY76_RS16160		tripartite tricarboxylate transporter permease	K07793	putative tricarboxylic transport membrane protein	plasmid unnamed1
RVY76_RS16165		tripartite tricarboxylate transporter TctB family protein			plasmid unnamed1
RVY76_RS16170		tripartite tricarboxylate transporter substrate binding protein	K07795	putative tricarboxylic transport membrane protein	plasmid unnamed1
RVY76_RS16965		ATP-binding protein	K10125	two-component system, NtrC family, C4-dicarboxylate transport sensor histidine kinase DctB [EC:2.7.13.3]	plasmid unnamed2
RVY76_RS16970		sigma-54 dependent transcriptional regulator	K10126	two-component system, NtrC family, C4-dicarboxylate transport response regulator DctD	plasmid unnamed2
RVY76_RS16975		DctP family TRAP transporter solute-binding subunit	K11688	C4-dicarboxylate-binding protein DctP	plasmid unnamed2
RVY76_RS16980		TRAP transporter small permease	K11689	C4-dicarboxylate transporter, DctQ subunit	plasmid unnamed2
RVY76_RS16985		TRAP transporter large permease	K11690	C4-dicarboxylate transporter, DctM subunit	plasmid unnamed2
RVY76_RS17360		tripartite tricarboxylate transporter permease	K07793	putative tricarboxylic transport membrane protein	plasmid unnamed3
RVY76_RS17365		tricarboxylate transporter			plasmid unnamed3
RVY76_RS17555		tripartite tricarboxylate transporter permease	K07793	putative tricarboxylic transport membrane protein	plasmid unnamed3
RVY76_RS17560		tripartite tricarboxylate transporter TctB family protein			plasmid unnamed3
RVY76_RS17565		tripartite tricarboxylate transporter substrate binding protein	K07795	putative tricarboxylic transport membrane protein	plasmid unnamed3
#Nucleoside
RVY76_RS01180		ABC transporter permease	K23536	general nucleoside transport system permease protein	chromosome
RVY76_RS01185		ABC transporter permease	K23535	general nucleoside transport system permease protein	chromosome
RVY76_RS01190		ABC transporter ATP-binding protein	K23537	general nucleoside transport system ATP-binding protein	chromosome
RVY76_RS03765		ABC transporter permease	K23536	general nucleoside transport system permease protein	chromosome
RVY76_RS03770		ABC transporter permease	K23535	general nucleoside transport system permease protein	chromosome
RVY76_RS03780		ABC transporter ATP-binding protein	K23537	general nucleoside transport system ATP-binding protein	chromosome
RVY76_RS10730		ABC transporter ATP-binding protein	K23537	general nucleoside transport system ATP-binding protein	chromosome
RVY76_RS10735		ABC transporter permease	K23535	general nucleoside transport system permease protein	chromosome
RVY76_RS10740		ABC transporter permease	K23536	general nucleoside transport system permease protein	chromosome
RVY76_RS10745		BMP family ABC transporter substrate-binding protein	K07335	basic membrane protein A and related proteins	chromosome
RVY76_RS16190		ABC transporter ATP-binding protein	K23537	general nucleoside transport system ATP-binding protein	plasmid unnamed1
RVY76_RS16195		ABC transporter permease	K23535	general nucleoside transport system permease protein	plasmid unnamed1
RVY76_RS16200		ABC transporter permease	K23536	general nucleoside transport system permease protein	plasmid unnamed1
RVY76_RS18115		cytosine permease	K10974	cytosine permease	plasmid unnamed3
#Osmoprotectant
RVY76_RS03890		BCCT family transporter	K02168	choline/glycine/proline betaine transport protein	chromosome
RVY76_RS08435		BCCT family transporter	K03451	betaine/carnitine transporter, BCCT family	chromosome
RVY76_RS09915		choline ABC transporter substrate-binding protein	K02002	glycine betaine/proline transport system substrate-binding protein	chromosome
RVY76_RS15415	strain-specific	ABC transporter substrate-binding protein	K05845	osmoprotectant transport system substrate-binding protein	plasmid unnamed1
RVY76_RS15420	strain-specific	ABC transporter permease	K05846	osmoprotectant transport system permease protein	plasmid unnamed1
RVY76_RS15425	strain-specific	ABC transporter ATP-binding protein	K05847	osmoprotectant transport system ATP-binding protein [EC:7.6.2.9]	plasmid unnamed1
RVY76_RS15430	strain-specific	ABC transporter permease	K05846	osmoprotectant transport system permease protein	plasmid unnamed1
RVY76_RS15755		BCCT family transporter	K02168	choline/glycine/proline betaine transport protein	plasmid unnamed1
#Nitrogen
RVY76_RS00320		ABC transporter permease subunit	K11074	putrescine transport system permease protein	chromosome
RVY76_RS00325		ABC transporter permease subunit	K11075	putrescine transport system permease protein	chromosome
RVY76_RS00330		ABC transporter ATP-binding protein	K11076	putrescine transport system ATP-binding protein [EC:7.6.2.16]	chromosome
RVY76_RS00335		polyamine ABC transporter substrate-binding protein	K11073	putrescine transport system substrate-binding protein	chromosome
RVY76_RS00340		FAD-binding oxidoreductase	K09471	gamma-glutamylputrescine oxidase [EC:1.4.3.-]	chromosome
RVY76_RS00345		glutamine synthetase family protein	K01915	glutamine synthetase [EC:6.3.1.2]	chromosome
RVY76_RS01935		ABC transporter permease	K11071	spermidine/putrescine transport system permease protein	chromosome
RVY76_RS01940		ABC transporter permease	K11070	spermidine/putrescine transport system permease protein	chromosome
RVY76_RS01945		ABC transporter ATP-binding protein	K11072	spermidine/putrescine transport system ATP-binding protein [EC:7.6.2.11]	chromosome
RVY76_RS06625		urea ABC transporter substrate-binding protein	K11959	urea transport system substrate-binding protein	chromosome
RVY76_RS06630		urea ABC transporter permease subunit UrtB	K11960	urea transport system permease protein	chromosome
RVY76_RS06635		urea ABC transporter permease subunit UrtC	K11961	urea transport system permease protein	chromosome
RVY76_RS06640		urea ABC transporter ATP-binding protein UrtD	K11962	urea transport system ATP-binding protein	chromosome
RVY76_RS06645		urea ABC transporter ATP-binding subunit UrtE	K11963	urea transport system ATP-binding protein	chromosome
RVY76_RS11190		ABC transporter permease	K02053	putative spermidine/putrescine transport system permease protein	chromosome
RVY76_RS11195		ABC transporter permease	K02054	putative spermidine/putrescine transport system permease protein	chromosome
RVY76_RS11205		extracellular solute-binding protein	K02055	putative spermidine/putrescine transport system substrate-binding protein	chromosome
RVY76_RS11210		ABC transporter ATP-binding protein	K02052	putative spermidine/putrescine transport system ATP-binding protein	chromosome
RVY76_RS13440		ammonium transporter	K03320	ammonium transporter, Amt family	chromosome
RVY76_RS15130		ABC transporter ATP-binding protein	K02052	putative spermidine/putrescine transport system ATP-binding protein	plasmid unnamed1
RVY76_RS15135		ABC transporter substrate-binding protein	K02055	putative spermidine/putrescine transport system substrate-binding protein	plasmid unnamed1
RVY76_RS15140		ABC transporter permease	K02054	putative spermidine/putrescine transport system permease protein	plasmid unnamed1
RVY76_RS15145		ABC transporter permease	K02053	putative spermidine/putrescine transport system permease protein	plasmid unnamed1
RVY76_RS16470		extracellular solute-binding protein	K02055	putative spermidine/putrescine transport system substrate-binding protein	plasmid unnamed2
RVY76_RS16475		ABC transporter permease	K02054	putative spermidine/putrescine transport system permease protein	plasmid unnamed2
RVY76_RS16480		ABC transporter permease	K02053	putative spermidine/putrescine transport system permease protein	plasmid unnamed2
RVY76_RS16485		ABC transporter ATP-binding protein	K02052	putative spermidine/putrescine transport system ATP-binding protein	plasmid unnamed2
RVY76_RS17085		ABC transporter ATP-binding protein	K11963	urea transport system ATP-binding protein	plasmid unnamed2
RVY76_RS17090		ABC transporter ATP-binding protein	K11962	urea transport system ATP-binding protein	plasmid unnamed2
RVY76_RS17095		ABC transporter permease	K11961	urea transport system permease protein	plasmid unnamed2
RVY76_RS17100		branched-chain amino acid ABC transporter permease	K11960	urea transport system permease protein	plasmid unnamed2
RVY76_RS17105		urea ABC transporter substrate-binding protein	K11959	urea transport system substrate-binding protein	plasmid unnamed2
RVY76_RS17970		ABC transporter substrate-binding protein	K02055	putative spermidine/putrescine transport system substrate-binding protein	plasmid unnamed3
RVY76_RS17975		ABC transporter ATP-binding protein	K02052	putative spermidine/putrescine transport system ATP-binding protein	plasmid unnamed3
RVY76_RS17980		ABC transporter permease	K02054	putative spermidine/putrescine transport system permease protein	plasmid unnamed3
RVY76_RS17985		ABC transporter permease	K02053	putative spermidine/putrescine transport system permease protein	plasmid unnamed3
#Phosphous
RVY76_RS00475		phosphate/phosphite/phosphonate ABC transporter substrate-binding protein	K02044	phosphonate transport system substrate-binding protein	chromosome
RVY76_RS00480		phosphonate ABC transporter ATP-binding protein	K02041	phosphonate transport system ATP-binding protein [EC:7.3.2.2]	chromosome
RVY76_RS00485		phosphonate ABC transporter, permease protein PhnE	K02042	phosphonate transport system permease protein	chromosome
RVY76_RS00490		phosphonate ABC transporter, permease protein PhnE	K02042	phosphonate transport system permease protein	chromosome
RVY76_RS05405		substrate-binding domain-containing protein	K02040	phosphate transport system substrate-binding protein	chromosome
RVY76_RS05410		phosphate ABC transporter permease subunit PstC	K02037	phosphate transport system permease protein	chromosome
RVY76_RS05415		phosphate ABC transporter permease PstA	K02038	phosphate transport system permease protein	chromosome
RVY76_RS05420		phosphate ABC transporter ATP-binding protein PstB	K02036	phosphate transport system ATP-binding protein [EC:7.3.2.1]	chromosome
RVY76_RS05425		phosphate signaling complex protein PhoU	K02039	phosphate transport system protein	chromosome
RVY76_RS13235		phosphate ABC transporter substrate-binding/OmpA family protein	K02040	phosphate transport system substrate-binding protein	chromosome
RVY76_RS17480		anion permease	K03306	inorganic phosphate transporter, PiT family	plasmid unnamed3
RVY76_RS18070		putative selenate ABC transporter substrate-binding protein	K02044	phosphonate transport system substrate-binding protein	plasmid unnamed3
RVY76_RS18075		ATP-binding cassette domain-containing protein	K02041	phosphonate transport system ATP-binding protein [EC:7.3.2.2]	plasmid unnamed3
RVY76_RS18080		ABC transporter permease	K02042	phosphonate transport system permease protein	plasmid unnamed3
#Sulfur
RVY76_RS00145		ATP-binding cassette domain-containing protein	K02045	sulfate/thiosulfate transport system ATP-binding protein [EC:7.3.2.3]	chromosome
RVY76_RS00150		sulfate ABC transporter permease subunit CysW	K02047	sulfate/thiosulfate transport system permease protein	chromosome
RVY76_RS00155		sulfate ABC transporter permease subunit CysT	K02046	sulfate/thiosulfate transport system permease protein	chromosome
RVY76_RS00160		thiosulfate ABC transporter substrate-binding protein CysP	K02048	sulfate/thiosulfate transport system substrate-binding protein	chromosome
RVY76_RS00445		SulP family inorganic anion transporter	K03321	sulfate permease, SulP family	chromosome
RVY76_RS15220		sulfate permease	K03321	sulfate permease, SulP family	plasmid unnamed1
#Vitamin
RVY76_RS00905		ABC transporter ATP-binding protein	K16784	biotin transport system ATP-binding protein [EC:7.6.2.-]	chromosome
RVY76_RS00910		energy-coupling factor transporter transmembrane component T	K16783	biotin transport system permease protein	chromosome
RVY76_RS00915		biotin transporter BioY	K03523	biotin transport system substrate-specific component	chromosome
RVY76_RS14085		thiamine ABC transporter substrate binding subunit	K02064	thiamine transport system substrate-binding protein	chromosome
RVY76_RS14090		thiamine/thiamine pyrophosphate ABC transporter permease ThiP	K02063	thiamine transport system permease protein	chromosome
RVY76_RS14095		ATP-binding cassette domain-containing protein	K02062	thiamine transport system ATP-binding protein [EC:7.6.2.15]	chromosome
RVY76_RS14405		ATP-binding cassette domain-containing protein	K05779	putative thiamine transport system ATP-binding protein	chromosome
RVY76_RS14410		ABC transporter permease subunit	K05778	putative thiamine transport system permease protein	chromosome
RVY76_RS14415		ABC transporter substrate-binding protein	K05777	putative thiamine transport system substrate-binding protein	chromosome
RVY76_RS18495	strain-specific	TonB-dependent receptor	K16092	vitamin B12 transporter	plasmid unnamed4
