# Supplementary material for: The metabolic characteristics and environmental adaptations of the intertidal bacterium Palleronia sp. LCG004
Source: Front Microbiol. 2024 Nov 22;15:1469112. doi: 10.3389/fmicb.2024.1469112 (PMC11638410; doi:10.3389/fmicb.2024.1469112)
Supplement: Supplementary file 10 [file Table_9.xlsx]

## Sheet: signalP-fused_proteins_format
#Table S9:The extracellular (signalP-fused) peptidases genes predicted in strain LCG004.
Gene ID	SignalP	NCBI annotation	KEGG number	KEGG annotation
#extracellular peptidase
RVY76_RS00900	TAT(Tat/SPI) CS pos: 23-24. AFA-QS. Pr: 0.9344	serine hydrolase
RVY76_RS09530	SP(Sec/SPI) CS pos: 19-20. ASA-QR. Pr: 0.8519	M23 family metallopeptidase
RVY76_RS10305	SP(Sec/SPI) CS pos: 20-21. ARA-AV. Pr: 0.9785	pitrilysin family protein	K07263	zinc protease [EC:3.4.24.-]
RVY76_RS10310	SP(Sec/SPI) CS pos: 19-20. ARA-AE. Pr: 0.9932	pitrilysin family protein	K07263	zinc protease [EC:3.4.24.-]
RVY76_RS10560	LIPO(Sec/SPII) CS pos: 22-23. VAG-CD. Pr: 0.6512	M48 family metallopeptidase
RVY76_RS11160	SP(Sec/SPI) CS pos: 21-22. AQA-QF. Pr: 0.9772	D-alanyl-D-alanine carboxypeptidase family protein	K07258	serine-type D-Ala-D-Ala carboxypeptidase (penicillin-binding protein 5/6) [EC:3.4.16.4]
RVY76_RS11435	LIPO(Sec/SPII) CS pos: 14-15. LTA-CG. Pr: 0.9988	M48 family metallopeptidase
RVY76_RS11460	SP(Sec/SPI) CS pos: 38-39. AKA-TP. Pr: 0.4209	Do family serine endopeptidase	K04771	serine protease Do [EC:3.4.21.107]
RVY76_RS13420	SP(Sec/SPI) CS pos: 28-29. LLA-QE. Pr: 0.8364	S41 family peptidase	K03797	carboxyl-terminal processing protease [EC:3.4.21.102]
#extracellular phosphatase and phospholipase
RVY76_RS11360	TAT(Tat/SPI) CS pos: 64-65. AQA-QT. Pr: 0.9185	PhoX family phosphatase	K07093	uncharacterized protein
RVY76_RS16250	SP(Sec/SPI) CS pos: 15-16. AMA-AD. Pr: 0.8727	phosphatidylinositol-specific phospholipase C/glycerophosphodiester phosphodiesterase family protein	K01126	glycerophosphoryl diester phosphodiesterase [EC:3.1.4.46]
#extracellular nuclease
RVY76_RS02245	SP(Sec/SPI) CS pos: 15-16. GHA-QD. Pr: 0.7952	ribonuclease T2	K01166	ribonuclease T2 [EC:4.6.1.19]
RVY76_RS01055	LIPO(Sec/SPII) CS pos: 17-18. LGA-CA. Pr: 0.9973	excinuclease ABC subunit B
RVY76_RS16490	TAT(Tat/SPI) CS pos: 49-50. ANA-LS. Pr: 0.3016	nucleoside hydrolase
#extracellular glycoside hydrolase
RVY76_RS10555	LIPO(Sec/SPII) CS pos: 16-17. LAA-CS. Pr: 0.9996	GH25 family lysozyme	K07273	lysozyme
