# Supplementary material for: The metabolic characteristics and environmental adaptations of the intertidal bacterium Palleronia sp. LCG004
Source: Front Microbiol. 2024 Nov 22;15:1469112. doi: 10.3389/fmicb.2024.1469112 (PMC11638410; doi:10.3389/fmicb.2024.1469112)
Supplement: Supplementary file 11 [file Table_10.xlsx]

## Sheet: other2_format
#Table S10:Clusters of genes involved in pigment biosynthesis and photosynthesis and other important genes in strain LCG004.
Gene ID	Specificity	NCBI annotation	KEGG number	KEGG annotation
#pigment biosynthesis and photosynthesis [Cluster 1]
RVY76_RS15955		sulfotransferase
RVY76_RS15960		glycosyltransferase family 2 protein
RVY76_RS15965		lysophospholipid acyltransferase family protein
RVY76_RS15970		phytoene desaturase family protein	K10210	diapolycopene oxygenase [EC:1.14.99.44]
RVY76_RS15975		phytoene desaturase family protein	K10027	phytoene desaturase [EC:1.3.99.26 1.3.99.28 1.3.99.29 1.3.99.31]
RVY76_RS15980		DUF2141 domain-containing protein
RVY76_RS15985		squalene/phytoene synthase family protein	K21679	hydroxysqualene synthase [EC:4.2.3.156]
RVY76_RS15990		squalene/phytoene synthase family protein	K21678	presqualene diphosphate synthase [EC:2.5.1.103]
RVY76_RS15995		FAD-dependent oxidoreductase
#pigment biosynthesis and photosynthesis [Cluster 2]
RVY76_RS00625		alpha/beta fold hydrolase	K06049	magnesium chelatase accessory protein
RVY76_RS00630		magnesium chelatase subunit D	K03404	magnesium chelatase subunit D [EC:6.6.1.1]
RVY76_RS00635		magnesium chelatase ATPase subunit I	K03405	magnesium chelatase subunit I [EC:6.6.1.1]
RVY76_RS00640		spheroidene monooxygenase	K09847	spheroidene monooxygenase [EC:1.14.15.9]
RVY76_RS00645		phytoene desaturase	K10027	phytoene desaturase [EC:1.3.99.26 1.3.99.28 1.3.99.29 1.3.99.31]
RVY76_RS00650		phytoene/squalene synthase family protein	K02291	15-cis-phytoene synthase [EC:2.5.1.32]
#pigment biosynthesis and photosynthesis [Cluster 3]
RVY76_RS13915		carotenoid 1,2-hydratase	K09844	carotenoid 1,2-hydratase [EC:4.2.1.131]
RVY76_RS13920		phytoene desaturase family protein	K09845	1-hydroxycarotenoid 3,4-desaturase [EC:1.3.99.27]
RVY76_RS13925		polyprenyl synthetase family protein	K13789	geranylgeranyl diphosphate synthase, type II [EC:2.5.1.1 2.5.1.10 2.5.1.29]
RVY76_RS13930		methyltransferase	K09846	demethylspheroidene O-methyltransferase [EC:2.1.1.210]
RVY76_RS13935		chlorophyll synthesis pathway protein BchC	K11337	bacteriochlorophyllide a dehydrogenase [EC:1.1.1.396]
RVY76_RS13940		chlorophyllide a reductase iron protein subunit X	K11333	3,8-divinyl chlorophyllide a/chlorophyllide a reductase subunit X [EC:1.3.7.14 1.3.7.15]
RVY76_RS13945		chlorophyllide a reductase subunit Y	K11334	3,8-divinyl chlorophyllide a/chlorophyllide a reductase subunit Y [EC:1.3.7.14 1.3.7.15]
RVY76_RS13950		chlorophyllide a reductase subunit Z	K11335	3,8-divinyl chlorophyllide a/chlorophyllide a reductase subunit Z [EC:1.3.7.14 1.3.7.15]
RVY76_RS13955		cytochrome PufQ
RVY76_RS13960		light-harvesting antenna LH1, beta subunit	K08927	light-harvesting complex 1 beta chain
RVY76_RS13965		light-harvesting antenna LH1, alpha subunit	K08926	light-harvesting complex 1 alpha chain
RVY76_RS13970		photosynthetic reaction center subunit L	K08928	photosynthetic reaction center L subunit
RVY76_RS13975		photosynthetic reaction center subunit M	K08929	photosynthetic reaction center M subunit
#pigment biosynthesis and photosynthesis [Cluster 4]
RVY76_RS13980		RC-LH1 core complex protein PufX
RVY76_RS14195		2-vinyl bacteriochlorophyllide hydratase	K11336	3-vinyl bacteriochlorophyllide hydratase [EC:4.2.1.165]
RVY76_RS14200		ferredoxin:protochlorophyllide reductase (ATP-dependent) subunit N	K04038	light-independent protochlorophyllide reductase subunit N [EC:1.3.7.7]
RVY76_RS14205		ferredoxin:protochlorophyllide reductase (ATP-dependent) subunit B	K04039	light-independent protochlorophyllide reductase subunit B [EC:1.3.7.7]
RVY76_RS14210		magnesium chelatase subunit H	K03403	magnesium chelatase subunit H [EC:6.6.1.1]
RVY76_RS14215		ferredoxin:protochlorophyllide reductase (ATP-dependent) iron-sulfur ATP-binding protein	K04037	light-independent protochlorophyllide reductase subunit L [EC:1.3.7.7]
RVY76_RS14220		magnesium protoporphyrin IX methyltransferase	K03428	magnesium-protoporphyrin O-methyltransferase [EC:2.1.1.11]
RVY76_RS14225		PucC family protein	K08226	MFS transporter, BCD family, chlorophyll transporter
RVY76_RS14230		photosynthetic reaction center subunit H	K13991	photosynthetic reaction center H subunit
RVY76_RS14235		photosynthetic complex putative assembly protein PuhB		photosynthetic complex putative assembly protein PuhB
RVY76_RS14240		photosynthetic complex assembly protein PuhC		photosynthetic complex assembly protein PuhC
RVY76_RS14245		hypothetical protein
RVY76_RS14250		magnesium-protoporphyrin IX monomethyl ester (oxidative) cyclase	K04035	magnesium-protoporphyrin IX monomethyl ester (oxidative) cyclase [EC:1.14.13.81]
RVY76_RS14255		putative photosynthetic complex assembly protein PuhE
RVY76_RS14260		5-aminolevulinate synthase	K00643	5-aminolevulinate synthase [EC:2.3.1.37]
#urease
RVY76_RS11880		urease accessory protein UreG	K03189	urease accessory protein
RVY76_RS11885		urease accessory UreF family protein	K03188	urease accessory protein
RVY76_RS11890		urease accessory protein UreE	K03187	urease accessory protein
RVY76_RS11900		urease subunit alpha	K01428	urease subunit alpha [EC:3.5.1.5]
RVY76_RS11910		urease subunit beta	K01429	urease subunit beta [EC:3.5.1.5]
RVY76_RS11915		urease subunit gamma	K01430	urease subunit gamma [EC:3.5.1.5]
RVY76_RS11920		urease accessory protein UreD	K03190	urease accessory protein
#polyphosphate kinase
RVY76_RS09830		RNA degradosome polyphosphate kinase	K00937	polyphosphate kinase [EC:2.7.4.1]
RVY76_RS09835		Ppx/GppA family phosphatase	K01524	exopolyphosphatase / guanosine-5'-triphosphate,3'-diphosphate pyrophosphatase [EC:3.6.1.11 3.6.1.40]
#GBMO and BHMT
RVY76_RS02205		iron-sulfur cluster-binding domain-containing protein	K21832	glycine betaine monooxygenase B [EC:1.14.13.251]
RVY76_RS02210		aromatic ring-hydroxylating dioxygenase subunit alpha	K00479	glycine betaine monooxygenase A [EC:1.14.13.251]
RVY76_RS00055	strain-specific	homocysteine S-methyltransferase family protein	K00544	betaine-homocysteine S-methyltransferase [EC:2.1.1.5]
#thiosulfate utilization
RVY76_RS13455		3-mercaptopyruvate sulfurtransferase	K01011	thiosulfate/3-mercaptopyruvate sulfurtransferase [EC:2.8.1.1 2.8.1.2]
RVY76_RS15740		rhodanese-like domain-containing protein	K01011	thiosulfate/3-mercaptopyruvate sulfurtransferase [EC:2.8.1.1 2.8.1.2]
#deoxyribodipyrimidine photo-lyase
RVY76_RS08430		deoxyribodipyrimidine photo-lyase	K01669	deoxyribodipyrimidine photo-lyase [EC:4.1.99.3]
#catalase/peroxidase/superoxide dismutase
RVY76_RS00675		catalase/peroxidase HPI	K03782	catalase-peroxidase [EC:1.11.1.21]
RVY76_RS00680		hydrogen peroxide-inducible genes activator	K04761	LysR family transcriptional regulator, hydrogen peroxide-inducible genes activator
RVY76_RS15760		catalase/peroxidase HPI	K03782	catalase-peroxidase [EC:1.11.1.21]
RVY76_RS17590		peroxidase-related enzyme
RVY76_RS04030		hypothetical protein	K07217	Mn-containing catalase
RVY76_RS06865		superoxide dismutase family protein
RVY76_RS09305		superoxide dismutase
